# Supplementary material for: Promoting ethylene epoxidation on gold nanoclusters: self and CO induced O2activation
Source: Royal Society of Chemistry journal article supplement (doi:10.1039/c5cp02809d), 2015-01-01
Supplement: c5cp02809d1.pdf [file c5cp02809d1.pdf]

## Supplementary Information:

### Promoting Ethylene Epoxidation on Gold Nanocluster: Self and CO Induced O<sub>2</sub> Activation

Hsin-Tsung Chen\* and Chen-Wei Chan

Department of Chemistry and Center for Nanotechnology, Chung Yuan Christian  
University, Chungli District, Taoyuan City 32023, Taiwan

Content:

Figure 1S. Energy diagrams for the CO-promoted trimolecular ethylene oxidation (black line) and CO-promoted trimolecular CO oxidation (blue line) on the gold nanocluster. The energy and bond length are in the unit of eV and Å, respectively.

Cartesian coordinates of intermediates and transition states mentioned in the potential energy surfaces in the paper (Figures 1~3) and C<sub>2</sub>H<sub>4</sub> adsorbed on Au(111) surface.

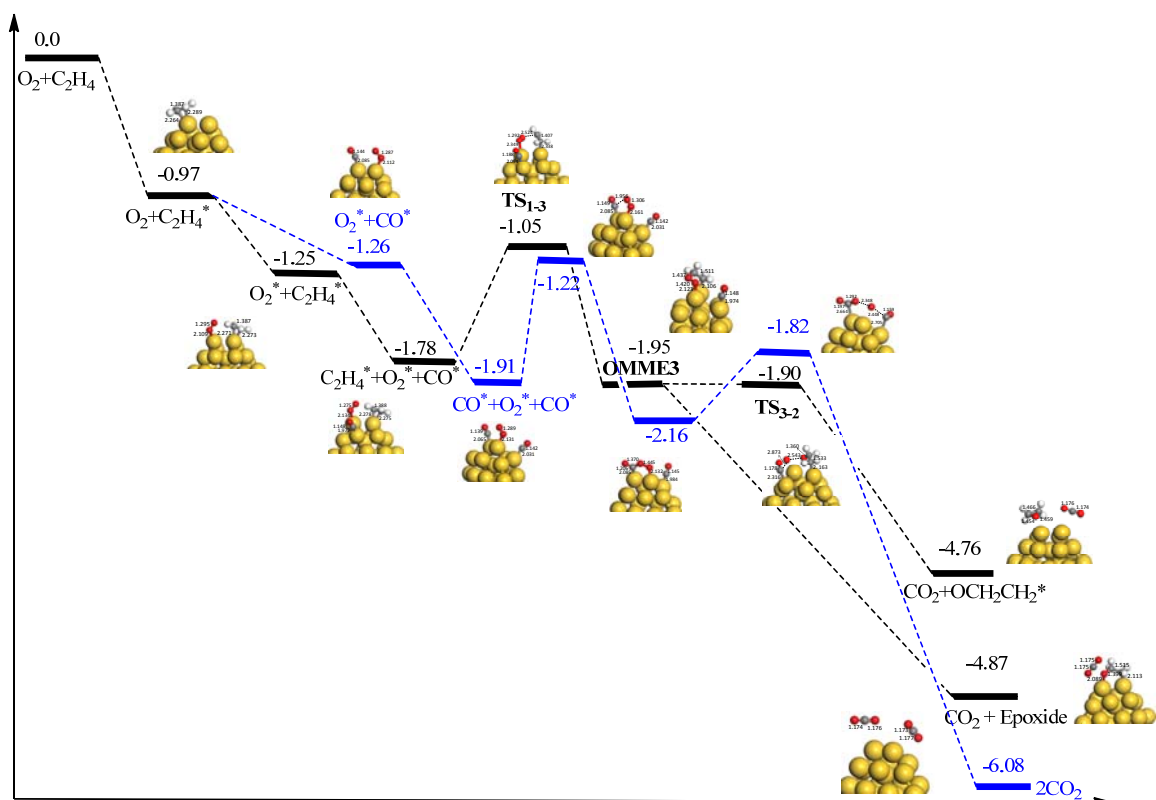

Figure 1S. Energy diagrams for the CO-promoted trimolecular ethylene oxidation (black line) and CO-promoted trimolecular CO oxidation (blue line) on the gold nanocluster. The energy and bond length are in the unit of eV and Å, respectively.

Cartesian coordinates of intermediates and transition states mentioned in the potential energy surfaces in the paper (Figures 1~3).

(a) Au<sub>29</sub>-C<sub>2</sub>H<sub>4</sub>\*

|    |             |             |             |
|----|-------------|-------------|-------------|
| Au | 5.87680000  | 6.51640000  | 5.89400000  |
| Au | 10.74000000 | 7.21540000  | 7.94200000  |
| Au | 6.96460000  | 11.25160000 | 6.59380000  |
| Au | 8.06580000  | 6.50920000  | 4.15520000  |
| Au | 13.47860000 | 8.25400000  | 5.03840000  |
| Au | 11.73640000 | 10.00820000 | 6.75240000  |
| Au | 10.65080000 | 7.72700000  | 5.19120000  |
| Au | 8.26000000  | 5.29220000  | 6.77540000  |
| Au | 10.78140000 | 4.38280000  | 7.74920000  |
| Au | 9.33360000  | 10.70640000 | 8.15600000  |
| Au | 13.51480000 | 8.08200000  | 7.86820000  |
| Au | 9.30200000  | 8.93260000  | 2.97720000  |
| Au | 5.30820000  | 9.02060000  | 6.93060000  |
| Au | 6.88260000  | 9.18020000  | 4.48340000  |
| Au | 8.35620000  | 8.27840000  | 6.77940000  |
| Au | 11.50540000 | 9.51020000  | 9.57120000  |
| Au | 13.12520000 | 5.45440000  | 9.08300000  |
| Au | 10.40880000 | 4.83240000  | 4.96680000  |
| Au | 8.71580000  | 5.47060000  | 9.56340000  |
| Au | 12.95580000 | 5.64980000  | 6.28860000  |
| Au | 10.17600000 | 6.13100000  | 2.37260000  |
| Au | 11.79700000 | 10.47700000 | 3.94340000  |
| Au | 8.87140000  | 8.39060000  | 9.96420000  |
| Au | 9.34800000  | 10.72240000 | 5.25480000  |
| Au | 11.17320000 | 6.79000000  | 10.67540000 |
| Au | 12.13380000 | 8.17560000  | 2.47400000  |
| Au | 6.55780000  | 7.08520000  | 8.70500000  |
| Au | 12.76680000 | 5.65840000  | 3.54660000  |
| Au | 6.73620000  | 9.99540000  | 9.18500000  |
| C  | 10.99020000 | 6.83920000  | 12.93100000 |
| C  | 11.94760000 | 5.88200000  | 12.62840000 |
| H  | 13.01280000 | 6.11960000  | 12.66680000 |
| H  | 11.68600000 | 4.82220000  | 12.58840000 |
| H  | 11.27920000 | 7.85320000  | 13.21460000 |
| H  | 9.95660000  | 6.55280000  | 13.13820000 |

(b) Au<sub>29</sub>-O<sub>2</sub>\*+C<sub>2</sub>H<sub>4</sub>\*

|    |             |             |             |
|----|-------------|-------------|-------------|
| Au | 5.91940000  | 6.44180000  | 5.88680000  |
| Au | 10.75340000 | 7.26140000  | 7.97380000  |
| Au | 6.87580000  | 11.20000000 | 6.50960000  |
| Au | 8.12740000  | 6.44660000  | 4.16720000  |
| Au | 13.47700000 | 8.35760000  | 5.04100000  |
| Au | 11.67020000 | 10.10860000 | 6.72340000  |
| Au | 10.66620000 | 7.76620000  | 5.20320000  |
| Au | 8.34260000  | 5.29320000  | 6.80660000  |
| Au | 10.88720000 | 4.43480000  | 7.83340000  |
| Au | 9.25660000  | 10.74080000 | 8.10600000  |
| Au | 13.50020000 | 8.26640000  | 7.86660000  |
| Au | 9.30440000  | 8.87580000  | 2.93800000  |
| Au | 5.29340000  | 8.91780000  | 6.91880000  |
| Au | 6.89020000  | 9.07580000  | 4.46120000  |
| Au | 8.36520000  | 8.26940000  | 6.79100000  |
| Au | 11.43340000 | 9.58700000  | 9.55640000  |
| Au | 13.12780000 | 5.61520000  | 9.13880000  |
| Au | 10.50020000 | 4.86460000  | 5.01280000  |
| Au | 8.76600000  | 5.50180000  | 9.58760000  |
| Au | 12.96440000 | 5.78380000  | 6.33080000  |
| Au | 10.24820000 | 6.11540000  | 2.39120000  |
| Au | 11.75160000 | 10.52100000 | 3.90220000  |
| Au | 8.80360000  | 8.45880000  | 9.94800000  |
| Au | 9.28220000  | 10.70580000 | 5.18580000  |
| Au | 11.08520000 | 6.93660000  | 10.76680000 |
| Au | 12.15040000 | 8.20200000  | 2.48620000  |
| Au | 6.57280000  | 7.05380000  | 8.71120000  |
| Au | 12.86040000 | 5.71220000  | 3.57600000  |
| Au | 6.66240000  | 10.02420000 | 9.14020000  |
| O  | 14.72868026 | 5.19195171  | 11.62482042 |
| O  | 14.83993954 | 5.40842357  | 10.35279632 |
| C  | 11.28720000 | 6.93360000  | 13.03120000 |
| C  | 11.72620000 | 5.70420000  | 12.56420000 |
| H  | 12.79160000 | 5.50580000  | 12.40140000 |
| H  | 11.05700000 | 4.83920000  | 12.57380000 |
| H  | 11.99980000 | 7.73540000  | 13.24300000 |
| H  | 10.27580000 | 7.06440000  | 13.42380000 |

(c) TS<sub>1</sub>

|    |             |             |             |
|----|-------------|-------------|-------------|
| Au | 5.52440000  | 9.29620000  | 6.68180000  |
| Au | 10.45060000 | 8.98180000  | 8.59280000  |
| Au | 6.85820000  | 13.44020000 | 8.89280000  |
| Au | 7.66060000  | 9.74980000  | 4.92760000  |
| Au | 13.16760000 | 10.91700000 | 6.01860000  |
| Au | 11.54760000 | 12.08820000 | 8.38180000  |
| Au | 10.33320000 | 10.49100000 | 6.19820000  |
| Au | 7.88640000  | 7.75860000  | 7.01300000  |
| Au | 10.37500000 | 6.39800000  | 7.44440000  |
| Au | 9.23620000  | 12.29420000 | 10.05400000 |
| Au | 13.29920000 | 9.90700000  | 8.65200000  |
| Au | 8.96740000  | 12.37560000 | 4.53640000  |
| Au | 5.13540000  | 11.24740000 | 8.58100000  |
| Au | 6.63560000  | 12.17540000 | 6.21000000  |
| Au | 8.13160000  | 10.52300000 | 8.01260000  |
| Au | 11.36320000 | 10.57980000 | 10.82260000 |
| Au | 12.73540000 | 7.08200000  | 8.99860000  |
| Au | 9.92700000  | 7.85920000  | 5.01500000  |
| Au | 8.45360000  | 6.92760000  | 9.65800000  |
| Au | 12.50000000 | 8.08740000  | 6.42700000  |
| Au | 9.68780000  | 9.94380000  | 3.01540000  |
| Au | 11.54380000 | 13.40780000 | 5.86260000  |
| Au | 8.69340000  | 9.53720000  | 11.05280000 |
| Au | 9.15600000  | 13.30080000 | 7.30340000  |
| Au | 10.83480000 | 7.70000000  | 11.14220000 |
| Au | 11.73360000 | 11.76240000 | 3.65500000  |
| Au | 6.34800000  | 8.80560000  | 9.50600000  |
| Au | 12.30260000 | 9.00560000  | 3.83980000  |
| Au | 6.65020000  | 11.42280000 | 10.96920000 |
| O  | 13.87080000 | 5.18140000  | 10.75560000 |
| O  | 14.31940000 | 6.28080000  | 10.21140000 |
| C  | 11.79980000 | 6.85940000  | 12.86620000 |
| C  | 12.16440000 | 5.55920000  | 12.54900000 |
| H  | 13.18900000 | 5.21100000  | 12.60840000 |
| H  | 11.41100000 | 4.85100000  | 12.18340000 |
| H  | 12.61360000 | 7.53780000  | 13.13140000 |
| H  | 10.97960000 | 6.84860000  | 13.58960000 |

## (d) OMME

|    |             |             |             |
|----|-------------|-------------|-------------|
| Au | 5.28240000  | 11.71420000 | 7.65800000  |
| Au | 10.20300000 | 10.53280000 | 9.15560000  |
| Au | 6.96840000  | 14.88880000 | 10.93980000 |
| Au | 7.38740000  | 12.53280000 | 6.02480000  |
| Au | 12.98580000 | 13.01860000 | 7.11060000  |
| Au | 11.53660000 | 13.51940000 | 9.82180000  |
| Au | 10.13440000 | 12.71200000 | 7.33080000  |
| Au | 7.54260000  | 10.01260000 | 7.45060000  |
| Au | 9.88200000  | 8.40160000  | 7.23440000  |
| Au | 9.29460000  | 13.31720000 | 11.61040000 |
| Au | 13.13840000 | 11.25340000 | 9.30700000  |
| Au | 8.86680000  | 15.09240000 | 6.36640000  |
| Au | 5.05720000  | 12.99920000 | 10.07820000 |
| Au | 6.56420000  | 14.50140000 | 8.01180000  |
| Au | 8.01620000  | 12.33380000 | 9.18720000  |
| Au | 11.33260000 | 11.34560000 | 11.67280000 |
| Au | 12.22920000 | 8.49300000  | 8.98100000  |
| Au | 9.51480000  | 10.58040000 | 5.43480000  |
| Au | 8.21040000  | 8.39880000  | 9.71600000  |
| Au | 12.10260000 | 10.21340000 | 6.75600000  |
| Au | 9.36460000  | 13.17840000 | 4.17360000  |
| Au | 11.52600000 | 15.49540000 | 7.78960000  |
| Au | 8.58760000  | 10.45620000 | 11.78080000 |
| Au | 9.19180000  | 15.12420000 | 9.27200000  |
| Au | 10.59660000 | 8.48280000  | 11.41780000 |
| Au | 11.54240000 | 14.66340000 | 5.15740000  |
| Au | 6.17540000  | 10.33760000 | 10.17100000 |
| Au | 11.93720000 | 11.91940000 | 4.57520000  |
| Au | 6.64740000  | 12.38020000 | 12.33220000 |
| O  | 12.44140000 | 5.86180000  | 10.07700000 |
| O  | 13.38080000 | 6.83980000  | 9.65600000  |
| C  | 12.09440000 | 7.22180000  | 12.18340000 |
| C  | 12.28820000 | 5.88620000  | 11.50520000 |
| H  | 13.19220000 | 5.41480000  | 11.94440000 |
| H  | 11.43460000 | 5.21040000  | 11.66480000 |
| H  | 13.00320000 | 7.83780000  | 12.13440000 |
| H  | 11.82540000 | 7.04880000  | 13.23800000 |

(e) TS<sub>2</sub>

|    |             |             |             |
|----|-------------|-------------|-------------|
| Au | 5.06580000  | 11.92220000 | 7.46940000  |
| Au | 9.92500000  | 10.65560000 | 9.08700000  |
| Au | 6.74040000  | 15.15360000 | 10.66380000 |
| Au | 7.22180000  | 12.68520000 | 5.85580000  |
| Au | 12.80140000 | 13.06160000 | 7.09320000  |
| Au | 11.33880000 | 13.62780000 | 9.76000000  |
| Au | 9.93200000  | 12.81780000 | 7.27340000  |
| Au | 7.28880000  | 10.18820000 | 7.30700000  |
| Au | 9.64080000  | 8.53940000  | 7.22300000  |
| Au | 9.09160000  | 13.56260000 | 11.44340000 |
| Au | 12.82300000 | 11.28700000 | 9.29800000  |
| Au | 8.74720000  | 15.20060000 | 6.16380000  |
| Au | 4.81440000  | 13.29100000 | 9.84460000  |
| Au | 6.41660000  | 14.70160000 | 7.78140000  |
| Au | 7.78060000  | 12.52660000 | 9.08420000  |
| Au | 11.04340000 | 11.33000000 | 11.61700000 |
| Au | 11.93520000 | 8.55640000  | 8.91640000  |
| Au | 9.32900000  | 10.68080000 | 5.36160000  |
| Au | 7.93780000  | 8.60320000  | 9.62160000  |
| Au | 11.88540000 | 10.29880000 | 6.71200000  |
| Au | 9.25100000  | 13.23200000 | 4.02920000  |
| Au | 11.44620000 | 15.62220000 | 7.69880000  |
| Au | 8.33920000  | 10.55300000 | 11.69020000 |
| Au | 9.03300000  | 15.31400000 | 9.05340000  |
| Au | 10.25540000 | 8.45760000  | 11.72960000 |
| Au | 11.41060000 | 14.64420000 | 5.11860000  |
| Au | 5.90500000  | 10.59580000 | 10.04140000 |
| Au | 11.80160000 | 11.92700000 | 4.46620000  |
| Au | 6.48360000  | 12.60660000 | 12.07800000 |
| O  | 10.45620000 | 6.30260000  | 11.44700000 |
| O  | 12.76120000 | 7.22500000  | 10.00520000 |
| C  | 11.43720000 | 7.38660000  | 13.14840000 |
| C  | 11.44120000 | 6.02400000  | 12.47140000 |
| H  | 12.44580000 | 5.76580000  | 12.06260000 |
| H  | 11.11200000 | 5.16820000  | 13.11720000 |
| H  | 12.34260000 | 7.98900000  | 13.21480000 |
| H  | 10.75620000 | 7.47840000  | 14.01360000 |

(f) TS<sub>3</sub>

|    |             |             |             |
|----|-------------|-------------|-------------|
| Au | 5.16700000  | 11.80020000 | 7.64800000  |
| Au | 10.11040000 | 10.64980000 | 9.06540000  |
| Au | 6.92060000  | 14.99340000 | 10.89780000 |
| Au | 7.26700000  | 12.63680000 | 6.00360000  |
| Au | 12.89220000 | 13.11260000 | 6.97800000  |
| Au | 11.51040000 | 13.61600000 | 9.70500000  |
| Au | 10.04160000 | 12.83240000 | 7.24440000  |
| Au | 7.42020000  | 10.10680000 | 7.37820000  |
| Au | 9.78460000  | 8.51900000  | 7.14860000  |
| Au | 9.27920000  | 13.42240000 | 11.51780000 |
| Au | 13.02400000 | 11.30600000 | 9.16540000  |
| Au | 8.72340000  | 15.21240000 | 6.30320000  |
| Au | 5.00820000  | 13.11960000 | 10.06480000 |
| Au | 6.46760000  | 14.61960000 | 7.98440000  |
| Au | 7.92300000  | 12.44660000 | 9.14320000  |
| Au | 11.29640000 | 11.40600000 | 11.54760000 |
| Au | 12.09780000 | 8.54560000  | 8.81940000  |
| Au | 9.37120000  | 10.69880000 | 5.35140000  |
| Au | 8.16260000  | 8.52200000  | 9.62640000  |
| Au | 11.98160000 | 10.32120000 | 6.62380000  |
| Au | 9.19860000  | 13.28720000 | 4.10460000  |
| Au | 11.47200000 | 15.62400000 | 7.70820000  |
| Au | 8.57960000  | 10.50880000 | 11.72440000 |
| Au | 9.14060000  | 15.21800000 | 9.19640000  |
| Au | 10.47400000 | 8.47480000  | 11.37740000 |
| Au | 11.36700000 | 14.75680000 | 5.09380000  |
| Au | 6.11480000  | 10.43280000 | 10.12960000 |
| Au | 11.79700000 | 12.03340000 | 4.42940000  |
| Au | 6.67580000  | 12.44740000 | 12.27200000 |
| O  | 12.62680000 | 5.30700000  | 10.73480000 |
| O  | 13.21280000 | 7.25900000  | 9.73720000  |
| C  | 12.09700000 | 6.87420000  | 12.51120000 |
| C  | 12.48440000 | 5.57940000  | 11.97020000 |
| H  | 13.03780000 | 4.94880000  | 12.69240000 |
| H  | 11.28420000 | 5.53380000  | 12.25040000 |
| H  | 12.36920000 | 7.76120000  | 11.94240000 |
| H  | 11.87200000 | 6.89200000  | 13.58640000 |

(g) Au<sub>29</sub>- C<sub>2</sub>H<sub>4</sub>\*+O<sub>2</sub>\*+C<sub>2</sub>H<sub>4</sub>\*

|    |             |             |             |
|----|-------------|-------------|-------------|
| Au | 5.85680000  | 6.63620000  | 5.85020000  |
| Au | 10.85760000 | 7.29040000  | 7.83580000  |
| Au | 6.89780000  | 11.28640000 | 6.48500000  |
| Au | 7.95520000  | 6.49140000  | 4.00680000  |
| Au | 13.34780000 | 8.28200000  | 4.91940000  |
| Au | 11.66380000 | 10.00920000 | 6.59240000  |
| Au | 10.53540000 | 7.71400000  | 5.08020000  |
| Au | 8.28000000  | 5.44520000  | 6.67880000  |
| Au | 10.76660000 | 4.41140000  | 7.61940000  |
| Au | 9.34900000  | 10.87140000 | 8.01680000  |
| Au | 13.55980000 | 8.19800000  | 7.81420000  |
| Au | 9.22900000  | 8.92120000  | 2.85940000  |
| Au | 5.27260000  | 9.07500000  | 7.01480000  |
| Au | 6.85800000  | 9.14960000  | 4.46220000  |
| Au | 8.38560000  | 8.38240000  | 6.79040000  |
| Au | 11.50500000 | 9.66340000  | 9.45660000  |
| Au | 13.07880000 | 5.28140000  | 8.93500000  |
| Au | 10.34560000 | 4.83760000  | 4.82800000  |
| Au | 8.88420000  | 5.65140000  | 9.44840000  |
| Au | 12.87920000 | 5.73000000  | 6.17140000  |
| Au | 10.08160000 | 6.14640000  | 2.25040000  |
| Au | 11.69680000 | 10.49220000 | 3.77840000  |
| Au | 8.92360000  | 8.53920000  | 9.90240000  |
| Au | 9.26440000  | 10.75100000 | 5.10560000  |
| Au | 11.29660000 | 6.98160000  | 10.58100000 |
| Au | 12.04080000 | 8.20000000  | 2.30320000  |
| Au | 6.61720000  | 7.18720000  | 8.69420000  |
| Au | 12.70100000 | 5.70940000  | 3.41440000  |
| Au | 6.80720000  | 10.15880000 | 9.13380000  |
| O  | 14.95400000 | 5.91660000  | 11.28020000 |
| O  | 14.78040000 | 5.08740000  | 10.29400000 |
| C  | 11.52460000 | 7.10240000  | 12.84140000 |
| C  | 11.95400000 | 5.84560000  | 12.44500000 |
| H  | 13.01900000 | 5.65260000  | 12.28180000 |
| H  | 11.28460000 | 4.98400000  | 12.50920000 |
| H  | 12.24280000 | 7.91020000  | 13.00260000 |
| H  | 10.51460000 | 7.26320000  | 13.22680000 |
| C  | 15.80920000 | 8.31800000  | 8.15540000  |
| C  | 15.21780000 | 8.60580000  | 9.37460000  |
| H  | 15.10160000 | 7.83020000  | 10.13800000 |
| H  | 15.06440000 | 9.64340000  | 9.68220000  |
| H  | 16.16980000 | 7.30960000  | 7.93920000  |
| H  | 16.14860000 | 9.11380000  | 7.48780000  |

(h) TS<sub>1-1</sub>

|    |             |             |             |
|----|-------------|-------------|-------------|
| Au | 5.01380000  | 10.26860000 | 6.93440000  |
| Au | 10.30720000 | 9.66280000  | 8.73840000  |
| Au | 6.71180000  | 14.38120000 | 9.73580000  |
| Au | 7.15160000  | 10.90440000 | 4.93240000  |
| Au | 13.20940000 | 11.81640000 | 6.25280000  |
| Au | 11.59240000 | 12.79160000 | 8.85420000  |
| Au | 10.09880000 | 11.33540000 | 6.26040000  |
| Au | 7.50640000  | 8.59180000  | 7.02240000  |
| Au | 9.93220000  | 6.77480000  | 7.04720000  |
| Au | 9.33820000  | 13.08180000 | 10.88340000 |
| Au | 13.16440000 | 10.29320000 | 8.90220000  |
| Au | 8.73980000  | 13.76200000 | 4.91120000  |
| Au | 4.70720000  | 12.12380000 | 9.25980000  |
| Au | 6.29760000  | 13.30100000 | 6.75120000  |
| Au | 7.95740000  | 11.41560000 | 8.56280000  |
| Au | 11.59740000 | 11.07600000 | 11.47360000 |
| Au | 12.29120000 | 7.40520000  | 8.74240000  |
| Au | 9.53000000  | 8.66600000  | 4.68820000  |
| Au | 8.34980000  | 7.31600000  | 9.68060000  |
| Au | 12.45120000 | 8.77420000  | 6.19340000  |
| Au | 9.33340000  | 11.25260000 | 2.93000000  |
| Au | 11.64500000 | 14.54600000 | 6.40380000  |
| Au | 8.58480000  | 9.98040000  | 11.58120000 |
| Au | 9.10460000  | 14.41380000 | 7.95980000  |
| Au | 10.80020000 | 8.06080000  | 11.24340000 |
| Au | 11.62300000 | 13.11000000 | 3.79000000  |
| Au | 6.03860000  | 9.31420000  | 9.82800000  |
| Au | 12.14120000 | 10.11900000 | 3.65080000  |
| Au | 6.50140000  | 12.02240000 | 11.75100000 |
| O  | 12.82826451 | 5.06861941  | 9.98400885  |
| O  | 13.76906451 | 5.96401941  | 9.87480885  |
| C  | 12.20808938 | 7.04824430  | 12.78609786 |
| C  | 12.27648938 | 5.66004430  | 12.49249786 |

|   |             |             |             |
|---|-------------|-------------|-------------|
| H | 13.24408938 | 5.13404430  | 12.43149786 |
| H | 11.38028938 | 5.04924430  | 12.37969786 |
| H | 13.10228938 | 7.64184430  | 12.61989786 |
| H | 11.53448938 | 7.45464430  | 13.56769786 |
| C | 15.47220000 | 10.83480000 | 9.59480000  |
| C | 15.40760000 | 9.43100000  | 9.72880000  |
| H | 15.65460000 | 8.74880000  | 8.91580000  |
| H | 15.11580000 | 8.98580000  | 10.69840000 |
| H | 15.84000000 | 11.28640000 | 8.65320000  |
| H | 15.27300000 | 11.51720000 | 10.42980000 |

(i) OMME1

|    |             |             |             |
|----|-------------|-------------|-------------|
| Au | 5.21080000  | 11.76920000 | 7.63360000  |
| Au | 10.24740000 | 10.58080000 | 9.07100000  |
| Au | 6.94120000  | 14.91760000 | 10.76800000 |
| Au | 7.18920000  | 12.55500000 | 5.82520000  |
| Au | 12.79360000 | 12.88740000 | 6.98760000  |
| Au | 11.38980000 | 13.36840000 | 9.56720000  |
| Au | 9.94580000  | 12.60420000 | 7.07120000  |
| Au | 7.49560000  | 10.12940000 | 7.39260000  |
| Au | 9.69180000  | 8.38760000  | 7.09820000  |
| Au | 9.28420000  | 13.46840000 | 11.54720000 |
| Au | 13.05840000 | 11.06140000 | 9.27800000  |
| Au | 8.78640000  | 15.05500000 | 6.21420000  |
| Au | 4.98160000  | 13.02940000 | 10.07840000 |
| Au | 6.51020000  | 14.46960000 | 7.90220000  |
| Au | 8.03340000  | 12.38120000 | 9.15980000  |
| Au | 11.26600000 | 11.47380000 | 11.72280000 |
| Au | 11.95740000 | 8.29420000  | 8.83400000  |
| Au | 9.33140000  | 10.47400000 | 5.20720000  |
| Au | 8.27960000  | 8.54760000  | 9.67900000  |
| Au | 11.96380000 | 10.10180000 | 6.64460000  |
| Au | 9.21040000  | 13.09720000 | 4.00060000  |
| Au | 11.46540000 | 15.41340000 | 7.57640000  |
| Au | 8.56460000  | 10.55860000 | 11.75120000 |
| Au | 9.15760000  | 15.18540000 | 9.10220000  |
| Au | 10.64880000 | 8.63300000  | 11.44720000 |
| Au | 11.41040000 | 14.58180000 | 4.93820000  |
| Au | 6.16840000  | 10.42720000 | 10.13920000 |
| Au | 11.76820000 | 11.81180000 | 4.46640000  |
| Au | 6.65080000  | 12.49540000 | 12.30200000 |
| O  | 12.16620000 | 5.79000000  | 10.22780000 |
| O  | 13.09180000 | 6.65380000  | 9.57300000  |
| C  | 12.15600000 | 7.37560000  | 12.20420000 |
| C  | 12.22440000 | 5.96920000  | 11.65000000 |
| H  | 13.17040000 | 5.50920000  | 12.00540000 |
| H  | 11.38660000 | 5.34760000  | 12.00140000 |
| H  | 13.08360000 | 7.93180000  | 12.01060000 |
| H  | 11.98860000 | 7.32060000  | 13.29180000 |
| C  | 15.13060000 | 11.36580000 | 10.14320000 |
| C  | 15.08700000 | 10.06380000 | 9.66960000  |
| H  | 15.47320000 | 9.81520000  | 8.67900000  |
| H  | 14.87840000 | 9.22140000  | 10.33220000 |
| H  | 15.57000000 | 12.16220000 | 9.53820000  |
| H  | 14.97300000 | 11.58440000 | 11.20140000 |

(j) TS<sub>1,2</sub>

|    |             |             |             |
|----|-------------|-------------|-------------|
| Au | 5.19540000  | 11.99740000 | 7.62600000  |
| Au | 10.07760000 | 10.43420000 | 9.10180000  |
| Au | 7.13460000  | 14.96740000 | 10.86860000 |
| Au | 7.31700000  | 12.67960000 | 5.94420000  |
| Au | 12.90180000 | 12.53640000 | 7.12160000  |
| Au | 11.47900000 | 13.14260000 | 9.72640000  |
| Au | 10.04900000 | 12.52980000 | 7.18580000  |
| Au | 7.32280000  | 10.14720000 | 7.38320000  |
| Au | 9.46720000  | 8.32540000  | 7.11180000  |
| Au | 9.33580000  | 13.29040000 | 11.61640000 |
| Au | 12.88920000 | 10.69900000 | 9.39460000  |
| Au | 9.05040000  | 15.06580000 | 6.34300000  |
| Au | 5.06400000  | 13.27180000 | 10.06480000 |
| Au | 6.69920000  | 14.67120000 | 7.97800000  |
| Au | 7.99640000  | 12.39560000 | 9.16360000  |
| Au | 11.18100000 | 11.15820000 | 11.79100000 |
| Au | 11.68580000 | 7.95900000  | 8.80620000  |
| Au | 9.23820000  | 10.48180000 | 5.28640000  |
| Au | 7.99460000  | 8.49020000  | 9.64240000  |
| Au | 11.87320000 | 9.82500000  | 6.70080000  |
| Au | 9.37520000  | 13.12460000 | 4.10880000  |
| Au | 11.76020000 | 15.17720000 | 7.77740000  |
| Au | 8.41100000  | 10.45600000 | 11.73500000 |

|    |             |             |             |
|----|-------------|-------------|-------------|
| Au | 9.38900000  | 15.07460000 | 9.23800000  |
| Au | 10.36940000 | 8.37120000  | 11.36800000 |
| Au | 11.67260000 | 14.36120000 | 5.14200000  |
| Au | 6.01840000  | 10.53860000 | 10.09060000 |
| Au | 11.79040000 | 11.58540000 | 4.55640000  |
| Au | 6.62900000  | 12.51000000 | 12.29840000 |
| O  | 12.91480000 | 6.48540000  | 10.34660000 |
| O  | 14.11300000 | 7.14140000  | 10.67120000 |
| C  | 11.69420000 | 7.13080000  | 12.41560000 |
| C  | 12.31140000 | 6.03160000  | 11.60140000 |
| H  | 13.12920000 | 5.52220000  | 12.14780000 |
| H  | 11.58840000 | 5.25960000  | 11.31280000 |
| H  | 12.49580000 | 7.80800000  | 12.74540000 |
| H  | 11.14080000 | 6.71660000  | 13.27140000 |
| C  | 15.01740000 | 10.38120000 | 10.05920000 |
| C  | 15.21480000 | 9.01220000  | 9.84220000  |
| H  | 15.14480000 | 8.62800000  | 8.81620000  |
| H  | 15.60800000 | 8.36340000  | 10.61900000 |
| H  | 15.37180000 | 11.08380000 | 9.26560000  |
| H  | 15.06700000 | 10.74900000 | 11.09220000 |

(k) OMME2

|    |             |             |             |
|----|-------------|-------------|-------------|
| Au | 5.21000000  | 12.10260000 | 7.63080000  |
| Au | 10.01360000 | 10.37500000 | 9.12240000  |
| Au | 7.24960000  | 14.99220000 | 10.91560000 |
| Au | 7.39860000  | 12.72740000 | 6.00760000  |
| Au | 12.97320000 | 12.35080000 | 7.20220000  |
| Au | 11.54680000 | 13.02280000 | 9.83660000  |
| Au | 10.12480000 | 12.48880000 | 7.26800000  |
| Au | 7.25500000  | 10.15020000 | 7.36520000  |
| Au | 9.36560000  | 8.28440000  | 7.11500000  |
| Au | 9.36180000  | 13.18680000 | 11.65740000 |
| Au | 12.87140000 | 10.48760000 | 9.46200000  |
| Au | 9.21540000  | 15.06000000 | 6.41760000  |
| Au | 5.12660000  | 13.38000000 | 10.06560000 |
| Au | 6.82920000  | 14.74860000 | 8.02600000  |
| Au | 7.99240000  | 12.39140000 | 9.16640000  |
| Au | 11.13460000 | 10.98140000 | 11.80760000 |
| Au | 11.54400000 | 7.84460000  | 8.80520000  |
| Au | 9.22760000  | 10.47840000 | 5.33240000  |
| Au | 7.88680000  | 8.47200000  | 9.62680000  |
| Au | 11.84820000 | 9.68540000  | 6.70880000  |
| Au | 9.47680000  | 13.12160000 | 4.17000000  |
| Au | 11.92820000 | 15.03040000 | 7.88440000  |
| Au | 8.33900000  | 10.39320000 | 11.72880000 |
| Au | 9.51900000  | 14.99020000 | 9.30580000  |
| Au | 10.22320000 | 8.23200000  | 11.35460000 |
| Au | 11.81080000 | 14.23180000 | 5.24580000  |
| Au | 5.96960000  | 10.58360000 | 10.06660000 |
| Au | 11.81800000 | 11.47200000 | 4.60740000  |
| Au | 6.63200000  | 12.50960000 | 12.29360000 |
| O  | 14.57930000 | 8.01170000  | 7.08060000  |
| O  | 14.84970000 | 7.91750000  | 8.54850000  |
| C  | 12.59620000 | 6.51210000  | 7.58640000  |
| C  | 14.09070000 | 6.71060000  | 6.69710000  |
| H  | 14.90980000 | 5.99480000  | 6.90500000  |
| H  | 13.99290000 | 6.82260000  | 5.60650000  |
| H  | 12.74960000 | 6.27090000  | 8.64770000  |
| H  | 12.24150000 | 5.60800000  | 7.06590000  |
| C  | 14.79860000 | 9.86680000  | 10.02600000 |
| C  | 15.52690000 | 9.12980000  | 8.92410000  |
| H  | 15.65830000 | 9.75800000  | 8.03130000  |
| H  | 16.53740000 | 8.82920000  | 9.27060000  |
| H  | 15.36150000 | 10.76840000 | 10.31050000 |
| H  | 14.65010000 | 9.23320000  | 10.91230000 |

(l) TS<sub>2-1</sub>

|    |             |             |             |
|----|-------------|-------------|-------------|
| Au | 5.17640000  | 11.94700000 | 7.62200000  |
| Au | 10.18080000 | 10.41480000 | 9.22220000  |
| Au | 7.13280000  | 15.00960000 | 10.83560000 |
| Au | 7.32920000  | 12.57940000 | 5.97300000  |
| Au | 12.98360000 | 12.31800000 | 7.42800000  |
| Au | 11.55780000 | 13.00400000 | 9.74160000  |
| Au | 10.06820000 | 12.49540000 | 7.22680000  |
| Au | 7.30780000  | 10.07340000 | 7.44320000  |
| Au | 9.50600000  | 8.26180000  | 7.36560000  |
| Au | 9.34100000  | 13.30440000 | 11.57320000 |
| Au | 13.35500000 | 10.62620000 | 9.80120000  |
| Au | 9.05440000  | 15.00700000 | 6.29900000  |
| Au | 5.06080000  | 13.31060000 | 10.01860000 |



|    |             |             |             |
|----|-------------|-------------|-------------|
| Au | 6.73060000  | 14.62160000 | 7.95220000  |
| Au | 8.02620000  | 12.32640000 | 9.16980000  |
| Au | 11.16260000 | 11.14560000 | 11.82360000 |
| Au | 11.76340000 | 7.99780000  | 9.00100000  |
| Au | 9.27600000  | 10.37960000 | 5.43580000  |
| Au | 7.87980000  | 8.50060000  | 9.73260000  |
| Au | 11.87240000 | 9.79460000  | 6.88620000  |
| Au | 9.40080000  | 13.02560000 | 4.16080000  |
| Au | 11.78500000 | 15.11320000 | 7.82800000  |
| Au | 8.32860000  | 10.54500000 | 11.76420000 |
| Au | 9.39860000  | 15.02880000 | 9.21040000  |
| Au | 10.17180000 | 8.39480000  | 11.53200000 |
| Au | 11.73180000 | 14.18520000 | 5.25360000  |
| Au | 5.95380000  | 10.57220000 | 10.12580000 |
| Au | 11.83060000 | 11.45100000 | 4.68720000  |
| Au | 6.56780000  | 12.60320000 | 12.30340000 |
| O  | 12.70900000 | 6.54780000  | 10.21600000 |
| O  | 14.05600000 | 9.12760000  | 11.11640000 |
| C  | 11.42960000 | 6.93820000  | 12.35520000 |
| C  | 12.04820000 | 6.01420000  | 11.30920000 |
| H  | 12.82840000 | 5.43800000  | 11.85860000 |
| H  | 11.28140000 | 5.28400000  | 10.99720000 |
| H  | 12.17080000 | 7.54860000  | 12.89580000 |
| H  | 10.82120000 | 6.36520000  | 13.08440000 |
| C  | 15.46500000 | 9.83540000  | 9.60540000  |
| C  | 15.14540000 | 8.56020000  | 10.34720000 |
| H  | 14.82600000 | 7.72920000  | 9.68660000  |
| H  | 15.94080000 | 8.14900000  | 11.00900000 |
| H  | 15.59180000 | 9.86620000  | 8.52020000  |
| H  | 16.04100000 | 10.55260000 | 10.18960000 |

(m) TS<sub>3-1</sub>

|    |             |             |             |
|----|-------------|-------------|-------------|
| Au | 5.20320000  | 12.04560000 | 7.70040000  |
| Au | 10.10920000 | 10.32580000 | 9.18540000  |
| Au | 7.31760000  | 15.02460000 | 10.90860000 |
| Au | 7.37140000  | 12.62760000 | 6.04060000  |
| Au | 12.97920000 | 12.29540000 | 7.18680000  |
| Au | 11.62740000 | 12.98320000 | 9.76300000  |
| Au | 10.12020000 | 12.43960000 | 7.25840000  |
| Au | 7.27120000  | 10.10460000 | 7.48360000  |
| Au | 9.41280000  | 8.20540000  | 7.29500000  |
| Au | 9.44820000  | 13.23380000 | 11.62720000 |
| Au | 13.16380000 | 10.55820000 | 9.45260000  |
| Au | 9.18280000  | 14.99200000 | 6.33940000  |
| Au | 5.18680000  | 13.38100000 | 10.10080000 |
| Au | 6.85700000  | 14.69300000 | 8.01700000  |
| Au | 8.05640000  | 12.35880000 | 9.20900000  |
| Au | 11.21960000 | 11.03020000 | 11.78080000 |
| Au | 11.71460000 | 7.83140000  | 8.96320000  |
| Au | 9.21200000  | 10.38820000 | 5.41720000  |
| Au | 7.85760000  | 8.48600000  | 9.75540000  |
| Au | 11.79500000 | 9.66820000  | 6.82440000  |
| Au | 9.42600000  | 13.00820000 | 4.18520000  |
| Au | 11.92120000 | 15.02640000 | 7.79740000  |
| Au | 8.39800000  | 10.47880000 | 11.80580000 |
| Au | 9.55160000  | 14.98940000 | 9.23940000  |
| Au | 10.21820000 | 8.31660000  | 11.49320000 |
| Au | 11.79340000 | 14.14740000 | 5.19400000  |
| Au | 5.99520000  | 10.60040000 | 10.19900000 |
| Au | 11.79960000 | 11.37360000 | 4.60240000  |
| Au | 6.70240000  | 12.60660000 | 12.36180000 |
| O  | 12.71520000 | 6.45540000  | 10.23200000 |
| O  | 14.62000000 | 8.56200000  | 10.70960000 |
| C  | 11.36560000 | 6.76320000  | 12.31800000 |
| C  | 11.98060000 | 5.86000000  | 11.25340000 |
| H  | 12.71480000 | 5.20140000  | 11.78380000 |
| H  | 11.19740000 | 5.18680000  | 10.84300000 |
| H  | 12.12880000 | 7.30200000  | 12.90860000 |
| H  | 10.70900000 | 6.17860000  | 12.98600000 |
| C  | 15.84160000 | 10.47420000 | 10.04080000 |
| C  | 15.69300000 | 9.05260000  | 10.20900000 |
| H  | 15.42600000 | 9.27140000  | 9.04480000  |
| H  | 16.65320000 | 8.48640000  | 10.18720000 |
| H  | 16.56020000 | 10.86740000 | 9.30920000  |
| H  | 15.32160000 | 11.16580000 | 10.70800000 |

(n) Au<sub>29</sub>-C<sub>2</sub>H<sub>4</sub>\*+O<sub>2</sub>\*+CO<sub>2</sub>\*

|    |             |             |            |
|----|-------------|-------------|------------|
| Au | 5.84400000  | 6.54460000  | 5.83840000 |
| Au | 10.86660000 | 7.21460000  | 7.92360000 |
| Au | 6.91020000  | 11.19740000 | 6.57380000 |

|    |             |             |             |
|----|-------------|-------------|-------------|
| Au | 7.98620000  | 6.46940000  | 4.04600000  |
| Au | 13.37380000 | 8.22900000  | 5.03240000  |
| Au | 11.67720000 | 9.93840000  | 6.74500000  |
| Au | 10.57920000 | 7.63820000  | 5.15320000  |
| Au | 8.25580000  | 5.36160000  | 6.70640000  |
| Au | 10.74160000 | 4.35300000  | 7.62180000  |
| Au | 9.31280000  | 10.78340000 | 8.15680000  |
| Au | 13.55180000 | 8.12700000  | 7.92800000  |
| Au | 9.27420000  | 8.92360000  | 2.96660000  |
| Au | 5.24820000  | 8.99240000  | 6.98980000  |
| Au | 6.88420000  | 9.10940000  | 4.52440000  |
| Au | 8.41600000  | 8.30480000  | 6.84400000  |
| Au | 11.47480000 | 9.56340000  | 9.59900000  |
| Au | 12.98520000 | 5.27880000  | 9.05140000  |
| Au | 10.33000000 | 4.77340000  | 4.85000000  |
| Au | 8.84800000  | 5.57760000  | 9.47220000  |
| Au | 12.94080000 | 5.61280000  | 6.23860000  |
| Au | 10.11640000 | 6.14820000  | 2.28960000  |
| Au | 11.74700000 | 10.45540000 | 3.93800000  |
| Au | 8.86300000  | 8.47200000  | 9.99460000  |
| Au | 9.30660000  | 10.71120000 | 5.24400000  |
| Au | 11.18340000 | 6.90160000  | 10.70600000 |
| Au | 12.07020000 | 8.20900000  | 2.38960000  |
| Au | 6.58600000  | 7.09100000  | 8.67620000  |
| Au | 12.69420000 | 5.71980000  | 3.50380000  |
| Au | 6.71280000  | 10.01140000 | 9.18320000  |
| O  | 14.67395632 | 5.30645277  | 11.53847617 |
| O  | 14.73936153 | 5.24064631  | 10.26668601 |
| C  | 11.42320000 | 6.99740000  | 12.96640000 |
| C  | 11.69020000 | 5.69460000  | 12.57020000 |
| H  | 12.72120000 | 5.36160000  | 12.42180000 |
| H  | 10.91580000 | 4.92640000  | 12.63080000 |
| H  | 12.24000000 | 7.70480000  | 13.12980000 |
| H  | 10.44020000 | 7.28740000  | 13.34320000 |
| C  | 15.39600000 | 8.30200000  | 8.61840000  |
| O  | 16.51380000 | 8.46100000  | 8.82720000  |

(o)TS<sub>1-3</sub>

|    |             |             |             |
|----|-------------|-------------|-------------|
| Au | 5.00000000  | 10.81140000 | 7.09560000  |
| Au | 10.34820000 | 10.07020000 | 8.99520000  |
| Au | 6.66666667  | 14.67460000 | 10.32120000 |
| Au | 7.24740000  | 11.63240000 | 5.27280000  |
| Au | 13.27360000 | 12.48440000 | 6.69900000  |
| Au | 11.59460000 | 13.23940000 | 9.40540000  |
| Au | 10.17220000 | 11.98060000 | 6.68560000  |
| Au | 7.47940000  | 9.08360000  | 7.13120000  |
| Au | 9.93920000  | 7.30300000  | 7.03180000  |
| Au | 9.25920000  | 13.23660000 | 11.39060000 |
| Au | 13.31760000 | 10.90600000 | 9.27020000  |
| Au | 8.81820000  | 14.50440000 | 5.49040000  |
| Au | 4.69980000  | 12.45120000 | 9.58120000  |
| Au | 6.31120000  | 13.88980000 | 7.22200000  |
| Au | 7.93000000  | 11.78920000 | 8.87240000  |
| Au | 11.54940000 | 11.21060000 | 11.80740000 |
| Au | 12.38907168 | 7.69282304  | 8.90498301  |
| Au | 9.59440000  | 9.43820000  | 4.87180000  |
| Au | 8.34340000  | 7.58980000  | 9.70720000  |
| Au | 12.47280000 | 9.43240000  | 6.47520000  |
| Au | 9.45760000  | 12.19480000 | 3.33333333  |
| Au | 11.66920000 | 15.19920000 | 7.08420000  |
| Au | 8.53980000  | 10.09160000 | 11.79800000 |
| Au | 9.07880000  | 14.86600000 | 8.58960000  |
| Au | 10.74260000 | 8.20980000  | 11.37540000 |
| Au | 11.75500000 | 13.96600000 | 4.35940000  |
| Au | 6.00420000  | 9.59220000  | 9.95320000  |
| Au | 12.22740000 | 10.96540000 | 4.00840000  |
| Au | 6.41540000  | 12.13160000 | 12.10740000 |
| O  | 12.90660000 | 5.20840000  | 10.00220000 |
| O  | 13.82300000 | 6.11200000  | 9.88680000  |
| C  | 12.30640000 | 7.05320000  | 12.67260000 |
| C  | 12.36360000 | 5.66960000  | 12.42320000 |
| H  | 13.31460000 | 5.12260000  | 12.40860000 |
| H  | 11.46900000 | 5.04680000  | 12.21880000 |
| H  | 13.20340000 | 7.64300000  | 12.49700000 |
| H  | 11.73100000 | 7.38200000  | 13.56460000 |
| C  | 15.06080000 | 9.80640000  | 9.93200000  |
| O  | 16.12660000 | 9.33440000  | 10.16140000 |

(p)OMME3

|    |            |             |            |
|----|------------|-------------|------------|
| Au | 5.27220000 | 11.69660000 | 7.56660000 |
|----|------------|-------------|------------|

|    |             |             |             |
|----|-------------|-------------|-------------|
| Au | 10.29500000 | 10.58000000 | 9.16520000  |
| Au | 6.89520000  | 14.83620000 | 10.83860000 |
| Au | 7.36240000  | 12.55900000 | 5.92700000  |
| Au | 12.93420000 | 13.05060000 | 7.22860000  |
| Au | 11.48640000 | 13.47780000 | 9.75020000  |
| Au | 10.08300000 | 12.68420000 | 7.25520000  |
| Au | 7.57280000  | 10.06520000 | 7.38480000  |
| Au | 9.84060000  | 8.42980000  | 7.14000000  |
| Au | 9.26300000  | 13.37920000 | 11.59200000 |
| Au | 13.27640000 | 11.39120000 | 9.51020000  |
| Au | 8.86120000  | 15.10120000 | 6.35100000  |
| Au | 5.02660000  | 12.91620000 | 10.02340000 |
| Au | 6.53400000  | 14.47360000 | 7.93760000  |
| Au | 8.01920000  | 12.33500000 | 9.17500000  |
| Au | 11.29800000 | 11.43900000 | 11.76800000 |
| Au | 12.04400000 | 8.30500000  | 8.87640000  |
| Au | 9.53020000  | 10.58940000 | 5.33920000  |
| Au | 8.32640000  | 8.44500000  | 9.65600000  |
| Au | 12.10160000 | 10.23720000 | 6.82560000  |
| Au | 9.41400000  | 13.23000000 | 4.17020000  |
| Au | 11.46860000 | 15.58100000 | 7.78300000  |
| Au | 8.59520000  | 10.47700000 | 11.73640000 |
| Au | 9.15740000  | 15.12760000 | 9.24080000  |
| Au | 10.70520000 | 8.59200000  | 11.45920000 |
| Au | 11.58540000 | 14.73360000 | 5.16040000  |
| Au | 6.20940000  | 10.30640000 | 10.09060000 |
| Au | 11.97900000 | 11.97680000 | 4.66920000  |
| Au | 6.62880000  | 12.35600000 | 12.28660000 |
| O  | 12.35300000 | 5.78820000  | 10.22740000 |
| O  | 13.24080000 | 6.71880000  | 9.62520000  |
| C  | 12.21420000 | 7.34080000  | 12.22940000 |
| C  | 12.33100000 | 5.94820000  | 11.65540000 |
| H  | 13.26740000 | 5.50160000  | 12.04960000 |
| H  | 11.49000000 | 5.30420000  | 11.95360000 |
| H  | 13.13320000 | 7.92120000  | 12.07080000 |
| H  | 12.01680000 | 7.26140000  | 13.31040000 |
| C  | 14.75980000 | 10.18440000 | 10.00000000 |
| O  | 15.71140000 | 9.61480000  | 10.29820000 |

(q)TS<sub>3-2</sub>

|    |             |             |             |
|----|-------------|-------------|-------------|
| Au | 4.92220000  | 11.67740000 | 7.46800000  |
| Au | 10.30440000 | 10.52160000 | 9.22400000  |
| Au | 6.76680000  | 15.17640000 | 11.01660000 |
| Au | 7.17100000  | 12.60300000 | 5.76900000  |
| Au | 13.20080000 | 13.07600000 | 7.17760000  |
| Au | 11.63760000 | 13.61900000 | 9.90760000  |
| Au | 10.11060000 | 12.72260000 | 7.19620000  |
| Au | 7.33520000  | 9.90200000  | 7.32580000  |
| Au | 9.76020000  | 8.10000000  | 7.08860000  |
| Au | 9.29220000  | 13.53280000 | 11.85620000 |
| Au | 13.49260000 | 11.04980000 | 9.57560000  |
| Au | 8.79720000  | 15.38040000 | 6.21740000  |
| Au | 4.70440000  | 13.10580000 | 10.08180000 |
| Au | 6.32600000  | 14.70780000 | 7.87640000  |
| Au | 7.90980000  | 12.37880000 | 9.25420000  |
| Au | 11.50900000 | 11.40680000 | 11.99020000 |
| Au | 12.28340000 | 8.08080000  | 8.93180000  |
| Au | 9.42620000  | 10.42460000 | 5.13800000  |
| Au | 8.15380000  | 8.17240000  | 9.72520000  |
| Au | 12.25080000 | 10.10760000 | 6.77380000  |
| Au | 9.32140000  | 13.26840000 | 3.86080000  |
| Au | 11.68460000 | 15.81340000 | 7.81440000  |
| Au | 8.45460000  | 10.43840000 | 11.97160000 |
| Au | 9.14700000  | 15.39560000 | 9.29440000  |
| Au | 10.55980000 | 8.50460000  | 11.47120000 |
| Au | 11.69020000 | 14.88400000 | 4.98140000  |
| Au | 5.90180000  | 10.18880000 | 10.17840000 |
| Au | 12.09200000 | 11.88940000 | 4.39420000  |
| Au | 6.44740000  | 12.44440000 | 12.54520000 |
| O  | 12.15040000 | 5.87760000  | 10.22200000 |
| O  | 14.15700000 | 6.94980000  | 9.08660000  |
| C  | 12.15120000 | 7.27900000  | 12.27440000 |
| C  | 12.24320000 | 5.91580000  | 11.57840000 |
| H  | 13.20220000 | 5.42620000  | 11.94180000 |
| H  | 11.38260000 | 5.26860000  | 11.98960000 |
| H  | 13.05380000 | 7.92420000  | 12.20360000 |
| H  | 11.84600000 | 7.15040000  | 13.34320000 |
| C  | 15.20260000 | 9.51300000  | 9.85400000  |
| O  | 16.03860000 | 8.93560000  | 10.44980000 |

(r)C<sub>2</sub>H<sub>4</sub>-Au(111)

|    |             |            |             |
|----|-------------|------------|-------------|
| Au | 4.28283231  | 7.47712274 | 21.56604067 |
| Au | -4.27119618 | 7.47839644 | 7.17470648  |
| Au | 1.46537413  | 0.78324841 | 4.61199611  |
| Au | -0.01129008 | 1.63250426 | 2.09341334  |
| Au | -1.48440721 | 7.47764721 | 21.58170597 |
| Au | -1.38136904 | 7.47345150 | 7.20074177  |
| Au | 4.34793410  | 0.78534626 | 4.62015972  |
| Au | 2.87291365  | 1.63430242 | 2.10444524  |
| Au | 1.39836904  | 7.47697290 | 21.55986281 |
| Au | 1.50456497  | 7.47539951 | 7.20714027  |
| Au | 7.22781213  | 0.78729427 | 4.59964039  |
| Au | 5.75296472  | 1.63235441 | 2.08194017  |
| Au | 7.16660347  | 2.48213473 | 21.56449621 |
| Au | -1.38733850 | 2.48505674 | 7.19963858  |
| Au | 0.02145547  | 3.27999318 | 4.62258674  |
| Au | -1.45083978 | 4.12917411 | 2.09098633  |
| Au | 1.39867184  | 2.48370812 | 21.58280916 |
| Au | 1.50067184  | 2.48610566 | 7.20714027  |
| Au | 2.90315030  | 3.28358950 | 4.62126291  |
| Au | 1.43219601  | 4.13089735 | 2.10951992  |
| Au | 4.28248626  | 2.48228457 | 21.56648195 |
| Au | 4.38972036  | 2.48205980 | 7.17911924  |
| Au | 5.78748380  | 3.28486320 | 4.59324188  |
| Au | 4.31250662  | 4.13134689 | 2.08370527  |
| Au | 5.72506395  | 4.97910427 | 21.56912960 |
| Au | -2.82675844 | 4.97790550 | 7.20294815  |
| Au | -1.42185759 | 5.77643826 | 4.61883589  |
| Au | -2.89588312 | 6.62606873 | 2.09341334  |
| Au | -0.04256489 | 4.98090243 | 21.58236788 |
| Au | 0.06047329  | 4.97895443 | 7.22236429  |
| Au | 1.46221637  | 5.78220736 | 4.61398186  |
| Au | -0.01176590 | 6.62816658 | 2.10621035  |
| Au | 2.83995182  | 4.98007828 | 21.56736450 |
| Au | 2.94666684  | 4.98389937 | 7.20669899  |
| Au | 4.34386794  | 5.77913550 | 4.60493570  |
| Au | 2.87027498  | 6.62936536 | 2.07973379  |
| C  | 2.56890346  | 0.69491381 | 9.29525830  |
| C  | 1.80701792  | 1.79800988 | 9.28885980  |
| H  | 3.65949894  | 0.75185553 | 9.28246130  |
| H  | -2.19918588 | 7.18859303 | 9.31290934  |
| H  | 2.24819606  | 2.79711237 | 9.27451833  |
| H  | 0.71646569  | 1.73964461 | 9.30651084  |
| Tv | 8.65140000  | 0.00000000 | 0.00000000  |
| Tv | -4.32570000 | 7.49233218 | 0.00000000  |
| Tv | 0.00000000  | 0.00000000 | 22.06380000 |
